# Supplementary material
Source: publisher figshare collection journal article supplement (https://acs.figshare.com/ndownloader/files/4113754)
Supplement: Supplementary file 1 [file 4113754]

 
data_CMF-t
 
_audit_creation_method            SHELXL-97 
_chemical_name_systematic 
; 
 ? 
; 
_chemical_name_common             ? 
_chemical_melting_point           ? 
_chemical_formula_moiety          ? 
_chemical_formula_sum 
 'C24.50 H16 Cl2 O' 
_chemical_formula_weight          397.27 
 
loop_ 
 _atom_type_symbol 
 _atom_type_description 
 _atom_type_scat_dispersion_real 
 _atom_type_scat_dispersion_imag 
 _atom_type_scat_source 
 'C'  'C'   0.0033   0.0016 
 'International Tables Vol C Tables 4.2.6.8 and 6.1.1.4' 
 'H'  'H'   0.0000   0.0000 
 'International Tables Vol C Tables 4.2.6.8 and 6.1.1.4' 
 'O'  'O'   0.0106   0.0060 
 'International Tables Vol C Tables 4.2.6.8 and 6.1.1.4' 
 'Cl'  'Cl'   0.1484   0.1585 
 'International Tables Vol C Tables 4.2.6.8 and 6.1.1.4' 
 
_symmetry_cell_setting            'Triclinic' 
_symmetry_space_group_name_H-M    'P-1   ' 
 
loop_ 
 _symmetry_equiv_pos_as_xyz 
 'x, y, z' 
 '-x, -y, -z' 
 
_cell_length_a                    7.2779(7) 
_cell_length_b                    11.8390(11) 
_cell_length_c                    12.4604(11) 
_cell_angle_alpha                 101.2630(10) 
_cell_angle_beta                  103.8560(10) 
_cell_angle_gamma                 91.1900(10) 
_cell_volume                      1019.73(16) 
_cell_formula_units_Z             2 
_cell_measurement_temperature     100(2) 
_cell_measurement_reflns_used     6259 
_cell_measurement_theta_min       2.70 
_cell_measurement_theta_max       26.02 
 
_exptl_crystal_description        plate 
_exptl_crystal_colour             yellow 
_exptl_crystal_size_max           0.32 
_exptl_crystal_size_mid           0.28 
_exptl_crystal_size_min           0.13 
_exptl_crystal_density_meas       ? 
_exptl_crystal_density_diffrn     1.294 
_exptl_crystal_density_method     'not measured' 
_exptl_crystal_F_000              410 
_exptl_absorpt_coefficient_mu     0.330 
_exptl_absorpt_correction_type    multi-scan 
_exptl_absorpt_correction_T_min   0.9019 
_exptl_absorpt_correction_T_max   0.9584 
_exptl_absorpt_process_details    SADABS 
 
_exptl_special_details 
; 
 ? 
; 
 
_diffrn_ambient_temperature       100(2) 
_diffrn_radiation_wavelength      0.71073 
_diffrn_radiation_type            MoK\a 
_diffrn_radiation_source          'fine-focus sealed tube' 
_diffrn_radiation_monochromator   graphite 
_diffrn_measurement_device_type   ? 
_diffrn_measurement_method        ? 
_diffrn_detector_area_resol_mean  ? 
_diffrn_standards_number          ? 
_diffrn_standards_interval_count  ? 
_diffrn_standards_interval_time   ? 
_diffrn_standards_decay_%         ? 
_diffrn_reflns_number             10683 
_diffrn_reflns_av_R_equivalents   0.0250 
_diffrn_reflns_av_sigmaI/netI     0.0322 
_diffrn_reflns_limit_h_min        -8 
_diffrn_reflns_limit_h_max        8 
_diffrn_reflns_limit_k_min        -14 
_diffrn_reflns_limit_k_max        14 
_diffrn_reflns_limit_l_min        -15 
_diffrn_reflns_limit_l_max        15 
_diffrn_reflns_theta_min          1.72 
_diffrn_reflns_theta_max          26.08 
_reflns_number_total              4000 
_reflns_number_gt                 3422 
_reflns_threshold_expression      >2sigma(I) 
 
_computing_cell_refinement      'Bruker SMART'
_computing_data_reduction       'Bruker SAINT'
_computing_structure_solution   'Bruker SHELXTL'
_computing_structure_refinement 'Bruker SHELXTL'
_computing_molecular_graphics   'Bruker SHELXTL'
_computing_publication_material 'Bruker SHELXTL' 
 
_refine_special_details 
; 
 Refinement of F^2^ against ALL reflections.  The weighted R-factor wR and 
 goodness of fit S are based on F^2^, conventional R-factors R are based 
 on F, with F set to zero for negative F^2^. The threshold expression of 
 F^2^ > 2sigma(F^2^) is used only for calculating R-factors(gt) etc. and is 
 not relevant to the choice of reflections for refinement.  R-factors based 
 on F^2^ are statistically about twice as large as those based on F, and R- 
 factors based on ALL data will be even larger. 
; 
 
_refine_ls_structure_factor_coef  Fsqd  
_refine_ls_matrix_type            full 
_refine_ls_weighting_scheme       calc  
_refine_ls_weighting_details 
 'calc w=1/[\s^2^(Fo^2^)+(0.0679P)^2^+0.3020P] where P=(Fo^2^+2Fc^2^)/3' 
_atom_sites_solution_primary      direct 
_atom_sites_solution_secondary    difmap 
_atom_sites_solution_hydrogens    geom 
_refine_ls_hydrogen_treatment     CONSTR
_refine_ls_extinction_method      none 
_refine_ls_extinction_coef        ? 
_refine_ls_number_reflns          4000 
_refine_ls_number_parameters      282 
_refine_ls_number_restraints      7 
_refine_ls_R_factor_all           0.0471 
_refine_ls_R_factor_gt            0.0396 
_refine_ls_wR_factor_ref          0.1138 
_refine_ls_wR_factor_gt           0.1082 
_refine_ls_goodness_of_fit_ref    1.048 
_refine_ls_restrained_S_all       1.050 
_refine_ls_shift/su_max           0.001 
_refine_ls_shift/su_mean          0.000 
 
loop_ 
 _atom_site_label 
 _atom_site_type_symbol 
 _atom_site_fract_x 
 _atom_site_fract_y 
 _atom_site_fract_z 
 _atom_site_U_iso_or_equiv 
 _atom_site_adp_type 
 _atom_site_occupancy 
 _atom_site_symmetry_multiplicity 
 _atom_site_calc_flag 
 _atom_site_refinement_flags 
 _atom_site_disorder_assembly 
 _atom_site_disorder_group 
C1 C 0.2099(2) -0.07672(14) 0.01731(15) 0.0198(4) Uani 1 1 d . . . 
C2 C 0.2669(2) 0.02674(15) -0.01807(14) 0.0183(4) Uani 1 1 d . . . 
C3 C 0.2998(2) 0.13190(15) 0.04960(14) 0.0183(4) Uani 1 1 d . . . 
H3 H 0.3401 0.1951 0.0221 0.022 Uiso 1 1 calc R . . 
C4 C 0.2755(2) 0.15138(15) 0.16351(14) 0.0176(4) Uani 1 1 d . . . 
C5 C 0.2177(2) 0.05152(15) 0.20140(15) 0.0195(4) Uani 1 1 d . . . 
H5 H 0.1991 0.0606 0.2754 0.023 Uiso 1 1 calc R . . 
C6 C 0.1897(2) -0.05366(15) 0.13401(15) 0.0199(4) Uani 1 1 d . . . 
C7 C 0.3009(2) 0.26107(15) 0.23079(14) 0.0186(4) Uani 1 1 d . . . 
C8 C 0.4042(3) 0.35600(14) 0.20389(14) 0.0191(4) Uani 1 1 d . . . 
C9 C 0.5762(3) 0.33977(15) 0.17420(14) 0.0216(4) Uani 1 1 d . . . 
H9 H 0.6288 0.2668 0.1722 0.026 Uiso 1 1 calc R . . 
C10 C 0.6713(3) 0.42911(17) 0.14751(15) 0.0280(4) Uani 1 1 d . . . 
H10 H 0.7888 0.4166 0.1281 0.034 Uiso 1 1 calc R . . 
C11 C 0.5975(3) 0.53633(17) 0.14870(16) 0.0325(5) Uani 1 1 d . . . 
C12 C 0.4267(3) 0.55270(16) 0.17873(16) 0.0328(5) Uani 1 1 d . . . 
H12 H 0.3742 0.6256 0.1798 0.039 Uiso 1 1 calc R . . 
C13 C 0.3311(3) 0.46477(15) 0.20720(15) 0.0259(4) Uani 1 1 d . . . 
H13 H 0.2157 0.4784 0.2290 0.031 Uiso 1 1 calc R . . 
C14 C 0.2184(2) 0.29027(14) 0.32931(14) 0.0189(4) Uani 1 1 d . . . 
C15 C 0.0306(3) 0.25378(15) 0.32050(15) 0.0218(4) Uani 1 1 d . . . 
H15 H -0.0421 0.2069 0.2520 0.026 Uiso 1 1 calc R . . 
C16 C -0.0507(3) 0.28562(16) 0.41118(15) 0.0231(4) Uani 1 1 d . . . 
H16 H -0.1789 0.2606 0.4036 0.028 Uiso 1 1 calc R . . 
C17 C 0.0517(3) 0.35305(16) 0.51234(15) 0.0226(4) Uani 1 1 d . . . 
C18 C 0.2383(3) 0.39028(16) 0.52130(15) 0.0259(4) Uani 1 1 d . . . 
H18 H 0.3102 0.4366 0.5903 0.031 Uiso 1 1 calc R . . 
C19 C 0.3215(3) 0.36087(16) 0.43111(15) 0.0235(4) Uani 1 1 d . . . 
H19 H 0.4483 0.3885 0.4383 0.028 Uiso 1 1 calc R . . 
C20 C 0.6991(4) 0.6323(2) 0.11635(19) 0.0515(7) Uani 1 1 d . . . 
H20A H 0.6446 0.6338 0.0367 0.077 Uiso 1 1 calc R . . 
H20B H 0.8342 0.6189 0.1278 0.077 Uiso 1 1 calc R . . 
H20C H 0.6844 0.7065 0.1636 0.077 Uiso 1 1 calc R . . 
C21 C -0.0371(3) 0.38478(18) 0.61084(16) 0.0297(4) Uani 1 1 d . . . 
H21A H -0.1749 0.3853 0.5827 0.045 Uiso 1 1 calc R . . 
H21B H 0.0146 0.4616 0.6546 0.045 Uiso 1 1 calc R . . 
H21C H -0.0088 0.3281 0.6592 0.045 Uiso 1 1 calc R . . 
Cl1 Cl 0.28966(6) 0.00779(4) -0.15582(3) 0.02206(14) Uani 1 1 d . . . 
Cl2 Cl 0.12568(7) -0.17354(4) 0.18077(4) 0.02730(15) Uani 1 1 d . . . 
O1 O 0.18053(19) -0.17286(10) -0.04463(11) 0.0263(3) Uani 1 1 d . . . 
C29 C 0.707(2) 0.9111(15) 0.4146(18) 0.142(12) Uani 0.50 1 d PD . . 
C24 C 0.621(2) 1.0919(13) 0.5262(10) 0.098(7) Uani 0.50 1 d PD . . 
C23 C 0.5617(10) 0.9696(6) 0.4741(4) 0.0652(18) Uani 0.50 1 d PD . . 
C28 C 0.4022(13) 0.9182(8) 0.4774(9) 0.052(4) Uani 0.50 1 d PD . . 
C26 C 0.311(2) 1.0928(16) 0.5789(16) 0.086(6) Uani 0.50 1 d PD . . 
C25 C 0.4745(14) 1.1411(6) 0.5782(6) 0.084(3) Uani 0.50 1 d PD . . 
C27 C 0.2656(12) 0.9801(10) 0.5368(9) 0.098(3) Uani 0.50 1 d PD . . 
 
loop_ 
 _atom_site_aniso_label 
 _atom_site_aniso_U_11 
 _atom_site_aniso_U_22 
 _atom_site_aniso_U_33 
 _atom_site_aniso_U_23 
 _atom_site_aniso_U_13 
 _atom_site_aniso_U_12 
C1 0.0144(9) 0.0195(9) 0.0242(9) 0.0005(7) 0.0049(7) 0.0042(7) 
C2 0.0150(9) 0.0228(9) 0.0169(8) 0.0025(7) 0.0048(7) 0.0038(7) 
C3 0.0160(8) 0.0188(9) 0.0207(9) 0.0042(7) 0.0055(7) 0.0012(7) 
C4 0.0144(8) 0.0186(9) 0.0194(8) 0.0027(7) 0.0046(7) 0.0019(7) 
C5 0.0178(9) 0.0209(9) 0.0205(9) 0.0038(7) 0.0066(7) 0.0031(7) 
C6 0.0174(9) 0.0178(9) 0.0262(9) 0.0063(7) 0.0074(7) 0.0023(7) 
C7 0.0170(9) 0.0198(9) 0.0186(8) 0.0036(7) 0.0037(7) 0.0030(7) 
C8 0.0237(9) 0.0178(9) 0.0141(8) -0.0001(7) 0.0039(7) -0.0001(7) 
C9 0.0229(9) 0.0208(9) 0.0189(9) 0.0008(7) 0.0039(7) -0.0015(7) 
C10 0.0280(10) 0.0341(11) 0.0190(9) 0.0024(8) 0.0041(8) -0.0116(8) 
C11 0.0471(13) 0.0277(11) 0.0175(9) 0.0034(8) 0.0007(9) -0.0163(9) 
C12 0.0573(14) 0.0148(9) 0.0224(10) 0.0016(7) 0.0042(9) 0.0017(9) 
C13 0.0345(11) 0.0201(9) 0.0222(9) 0.0012(7) 0.0075(8) 0.0055(8) 
C14 0.0219(9) 0.0156(8) 0.0197(9) 0.0030(7) 0.0063(7) 0.0034(7) 
C15 0.0224(9) 0.0202(9) 0.0199(9) -0.0014(7) 0.0042(7) 0.0003(7) 
C16 0.0203(9) 0.0250(9) 0.0244(9) 0.0029(8) 0.0082(7) 0.0024(7) 
C17 0.0274(10) 0.0226(9) 0.0199(9) 0.0043(7) 0.0096(8) 0.0055(8) 
C18 0.0307(10) 0.0264(10) 0.0172(9) -0.0003(7) 0.0038(8) -0.0001(8) 
C19 0.0213(9) 0.0250(9) 0.0225(9) 0.0018(7) 0.0048(7) -0.0007(7) 
C20 0.0727(18) 0.0411(13) 0.0315(12) 0.0133(10) -0.0063(11) -0.0332(12) 
C21 0.0333(11) 0.0368(11) 0.0211(10) 0.0029(8) 0.0128(8) 0.0043(9) 
Cl1 0.0218(2) 0.0251(2) 0.0183(2) -0.00035(17) 0.00708(17) 0.00198(17) 
Cl2 0.0326(3) 0.0178(2) 0.0351(3) 0.00810(19) 0.0134(2) 0.00155(18) 
O1 0.0292(7) 0.0181(7) 0.0291(7) -0.0028(5) 0.0090(6) 0.0005(5) 
C29 0.28(3) 0.104(15) 0.094(13) 0.071(12) 0.085(16) 0.127(16) 
C24 0.155(15) 0.083(11) 0.049(7) 0.024(6) 0.006(8) -0.008(10) 
C23 0.100(5) 0.069(4) 0.036(3) 0.036(3) 0.012(3) 0.030(4) 
C28 0.041(4) 0.015(3) 0.084(8) 0.021(4) -0.023(4) -0.011(3) 
C26 0.097(9) 0.113(15) 0.084(11) 0.066(10) 0.051(8) 0.045(8) 
C25 0.124(8) 0.055(4) 0.049(4) 0.010(3) -0.024(4) 0.005(5) 
C27 0.067(5) 0.122(8) 0.119(7) 0.081(6) 0.008(5) 0.008(5) 
 
_geom_special_details 
; 
 All esds (except the esd in the dihedral angle between two l.s. planes) 
 are estimated using the full covariance matrix.  The cell esds are taken 
 into account individually in the estimation of esds in distances, angles 
 and torsion angles; correlations between esds in cell parameters are only 
 used when they are defined by crystal symmetry.  An approximate (isotropic) 
 treatment of cell esds is used for estimating esds involving l.s. planes. 
; 
 
loop_ 
 _geom_bond_atom_site_label_1 
 _geom_bond_atom_site_label_2 
 _geom_bond_distance 
 _geom_bond_site_symmetry_2 
 _geom_bond_publ_flag 
C1 O1 1.227(2) . ? 
C1 C2 1.464(2) . ? 
C1 C6 1.469(2) . ? 
C2 C3 1.341(2) . ? 
C2 Cl1 1.7353(17) . ? 
C3 C4 1.447(2) . ? 
C3 H3 0.9500 . ? 
C4 C7 1.384(2) . ? 
C4 C5 1.446(2) . ? 
C5 C6 1.340(2) . ? 
C5 H5 0.9500 . ? 
C6 Cl2 1.7312(17) . ? 
C7 C8 1.474(2) . ? 
C7 C14 1.478(2) . ? 
C8 C9 1.394(3) . ? 
C8 C13 1.401(2) . ? 
C9 C10 1.388(3) . ? 
C9 H9 0.9500 . ? 
C10 C11 1.387(3) . ? 
C10 H10 0.9500 . ? 
C11 C12 1.388(3) . ? 
C11 C20 1.513(3) . ? 
C12 C13 1.388(3) . ? 
C12 H12 0.9500 . ? 
C13 H13 0.9500 . ? 
C14 C15 1.397(3) . ? 
C14 C19 1.405(2) . ? 
C15 C16 1.390(2) . ? 
C15 H15 0.9500 . ? 
C16 C17 1.383(3) . ? 
C16 H16 0.9500 . ? 
C17 C18 1.391(3) . ? 
C17 C21 1.508(2) . ? 
C18 C19 1.390(3) . ? 
C18 H18 0.9500 . ? 
C19 H19 0.9500 . ? 
C20 H20A 0.9800 . ? 
C20 H20B 0.9800 . ? 
C20 H20C 0.9800 . ? 
C21 H21A 0.9800 . ? 
C21 H21B 0.9800 . ? 
C21 H21C 0.9800 . ? 
C29 C26 0.18(2) 2_676 ? 
C29 C27 1.30(2) 2_676 ? 
C29 C25 1.477(17) 2_676 ? 
C29 C23 1.534(9) . ? 
C24 C28 0.20(3) 2_676 ? 
C24 C25 1.453(17) . ? 
C24 C27 1.448(16) 2_676 ? 
C24 C23 1.476(17) . ? 
C24 C23 1.504(18) 2_676 ? 
C23 C28 1.312(13) . ? 
C23 C28 1.339(13) 2_676 ? 
C23 C25 1.335(10) 2_676 ? 
C23 C23 1.366(12) 2_676 ? 
C23 C26 1.403(16) 2_676 ? 
C23 C27 1.426(11) 2_676 ? 
C23 C24 1.504(18) 2_676 ? 
C28 C24 0.20(3) 2_676 ? 
C28 C23 1.339(13) 2_676 ? 
C28 C25 1.383(15) 2_676 ? 
C28 C27 1.498(15) . ? 
C26 C29 0.18(2) 2_676 ? 
C26 C25 1.313(17) . ? 
C26 C27 1.34(2) . ? 
C26 C23 1.403(16) 2_676 ? 
C25 C23 1.335(10) 2_676 ? 
C25 C28 1.382(15) 2_676 ? 
C25 C29 1.477(17) 2_676 ? 
C27 C29 1.30(2) 2_676 ? 
C27 C23 1.426(11) 2_676 ? 
C27 C24 1.448(16) 2_676 ? 
 
loop_ 
 _geom_angle_atom_site_label_1 
 _geom_angle_atom_site_label_2 
 _geom_angle_atom_site_label_3 
 _geom_angle 
 _geom_angle_site_symmetry_1 
 _geom_angle_site_symmetry_3 
 _geom_angle_publ_flag 
O1 C1 C2 123.32(16) . . ? 
O1 C1 C6 123.41(16) . . ? 
C2 C1 C6 113.28(14) . . ? 
C3 C2 C1 123.46(15) . . ? 
C3 C2 Cl1 120.19(13) . . ? 
C1 C2 Cl1 116.35(12) . . ? 
C2 C3 C4 121.57(16) . . ? 
C2 C3 H3 119.2 . . ? 
C4 C3 H3 119.2 . . ? 
C7 C4 C5 122.14(16) . . ? 
C7 C4 C3 121.15(15) . . ? 
C5 C4 C3 116.68(15) . . ? 
C6 C5 C4 121.23(16) . . ? 
C6 C5 H5 119.4 . . ? 
C4 C5 H5 119.4 . . ? 
C5 C6 C1 123.75(16) . . ? 
C5 C6 Cl2 121.10(14) . . ? 
C1 C6 Cl2 115.15(13) . . ? 
C4 C7 C8 121.24(15) . . ? 
C4 C7 C14 121.89(15) . . ? 
C8 C7 C14 116.80(14) . . ? 
C9 C8 C13 118.42(16) . . ? 
C9 C8 C7 120.99(16) . . ? 
C13 C8 C7 120.59(16) . . ? 
C10 C9 C8 120.63(18) . . ? 
C10 C9 H9 119.7 . . ? 
C8 C9 H9 119.7 . . ? 
C11 C10 C9 121.08(19) . . ? 
C11 C10 H10 119.5 . . ? 
C9 C10 H10 119.5 . . ? 
C10 C11 C12 118.31(17) . . ? 
C10 C11 C20 120.8(2) . . ? 
C12 C11 C20 120.9(2) . . ? 
C13 C12 C11 121.35(19) . . ? 
C13 C12 H12 119.3 . . ? 
C11 C12 H12 119.3 . . ? 
C12 C13 C8 120.18(19) . . ? 
C12 C13 H13 119.9 . . ? 
C8 C13 H13 119.9 . . ? 
C15 C14 C19 118.47(16) . . ? 
C15 C14 C7 120.20(15) . . ? 
C19 C14 C7 121.21(16) . . ? 
C16 C15 C14 120.48(16) . . ? 
C16 C15 H15 119.8 . . ? 
C14 C15 H15 119.8 . . ? 
C17 C16 C15 121.20(17) . . ? 
C17 C16 H16 119.4 . . ? 
C15 C16 H16 119.4 . . ? 
C16 C17 C18 118.55(16) . . ? 
C16 C17 C21 120.61(17) . . ? 
C18 C17 C21 120.84(17) . . ? 
C19 C18 C17 121.20(17) . . ? 
C19 C18 H18 119.4 . . ? 
C17 C18 H18 119.4 . . ? 
C18 C19 C14 120.08(17) . . ? 
C18 C19 H19 120.0 . . ? 
C14 C19 H19 120.0 . . ? 
C11 C20 H20A 109.5 . . ? 
C11 C20 H20B 109.5 . . ? 
H20A C20 H20B 109.5 . . ? 
C11 C20 H20C 109.5 . . ? 
H20A C20 H20C 109.5 . . ? 
H20B C20 H20C 109.5 . . ? 
C17 C21 H21A 109.5 . . ? 
C17 C21 H21B 109.5 . . ? 
H21A C21 H21B 109.5 . . ? 
C17 C21 H21C 109.5 . . ? 
H21A C21 H21C 109.5 . . ? 
H21B C21 H21C 109.5 . . ? 
C26 C29 C27 98(10) 2_676 2_676 ? 
C26 C29 C25 22(10) 2_676 2_676 ? 
C27 C29 C25 112.3(8) 2_676 2_676 ? 
C26 C29 C23 41(10) 2_676 . ? 
C27 C29 C23 59.7(6) 2_676 . ? 
C25 C29 C23 52.6(5) 2_676 . ? 
C28 C24 C25 65(6) 2_676 . ? 
C28 C24 C27 101(7) 2_676 2_676 ? 
C25 C24 C27 166.4(15) . 2_676 ? 
C28 C24 C23 44(6) 2_676 . ? 
C25 C24 C23 108.2(13) . . ? 
C27 C24 C23 58.4(7) 2_676 . ? 
C28 C24 C23 14(6) 2_676 2_676 ? 
C25 C24 C23 53.6(7) . 2_676 ? 
C27 C24 C23 112.9(12) 2_676 2_676 ? 
C23 C24 C23 54.6(8) . 2_676 ? 
C28 C23 C28 118.0(6) . 2_676 ? 
C28 C23 C25 63.0(8) . 2_676 ? 
C28 C23 C25 177.8(8) 2_676 2_676 ? 
C28 C23 C23 60.0(7) . 2_676 ? 
C28 C23 C23 58.0(7) 2_676 2_676 ? 
C25 C23 C23 122.9(10) 2_676 2_676 ? 
C28 C23 C26 120.1(9) . 2_676 ? 
C28 C23 C26 121.9(11) 2_676 2_676 ? 
C25 C23 C26 57.2(10) 2_676 2_676 ? 
C23 C23 C26 179.8(15) 2_676 2_676 ? 
C28 C23 C27 176.0(8) . 2_676 ? 
C28 C23 C27 65.5(7) 2_676 2_676 ? 
C25 C23 C27 113.5(9) 2_676 2_676 ? 
C23 C23 C27 123.5(10) 2_676 2_676 ? 
C26 C23 C27 56.4(9) 2_676 2_676 ? 
C28 C23 C24 123.7(9) . . ? 
C28 C23 C24 5.9(10) 2_676 . ? 
C25 C23 C24 173.3(10) 2_676 . ? 
C23 C23 C24 63.8(8) 2_676 . ? 
C26 C23 C24 116.1(11) 2_676 . ? 
C27 C23 C24 59.8(8) 2_676 . ? 
C28 C23 C24 2.0(9) . 2_676 ? 
C28 C23 C24 119.7(10) 2_676 2_676 ? 
C25 C23 C24 61.2(7) 2_676 2_676 ? 
C23 C23 C24 61.7(8) 2_676 2_676 ? 
C26 C23 C24 118.4(13) 2_676 2_676 ? 
C27 C23 C24 174.0(9) 2_676 2_676 ? 
C24 C23 C24 125.4(8) . 2_676 ? 
C28 C23 C29 124.5(10) . . ? 
C28 C23 C29 117.5(9) 2_676 . ? 
C25 C23 C29 61.5(7) 2_676 . ? 
C23 C23 C29 175.2(11) 2_676 . ? 
C26 C23 C29 4.8(13) 2_676 . ? 
C27 C23 C29 52.0(9) 2_676 . ? 
C24 C23 C29 111.8(11) . . ? 
C24 C23 C29 122.7(8) 2_676 . ? 
C24 C28 C23 164(7) 2_676 . ? 
C24 C28 C23 131(7) 2_676 2_676 ? 
C23 C28 C23 62.0(6) . 2_676 ? 
C24 C28 C25 107(7) 2_676 2_676 ? 
C23 C28 C25 59.3(6) . 2_676 ? 
C23 C28 C25 121.3(9) 2_676 2_676 ? 
C24 C28 C27 72(6) 2_676 . ? 
C23 C28 C27 122.0(8) . . ? 
C23 C28 C27 60.0(6) 2_676 . ? 
C25 C28 C27 178.7(9) 2_676 . ? 
C29 C26 C25 155(10) 2_676 . ? 
C29 C26 C27 74(10) 2_676 . ? 
C25 C26 C27 121.2(12) . . ? 
C29 C26 C23 134(10) 2_676 2_676 ? 
C25 C26 C23 58.8(7) . 2_676 ? 
C27 C26 C23 62.7(9) . 2_676 ? 
C26 C25 C23 64.0(9) . 2_676 ? 
C26 C25 C28 121.7(8) . 2_676 ? 
C23 C25 C28 57.7(7) 2_676 2_676 ? 
C26 C25 C24 129.1(12) . . ? 
C23 C25 C24 65.1(7) 2_676 . ? 
C28 C25 C24 7.5(10) 2_676 . ? 
C26 C25 C29 3.0(16) . 2_676 ? 
C23 C25 C29 65.9(7) 2_676 2_676 ? 
C28 C25 C29 123.6(10) 2_676 2_676 ? 
C24 C25 C29 131.0(9) . 2_676 ? 
C29 C27 C26 7.7(9) 2_676 . ? 
C29 C27 C23 68.3(7) 2_676 2_676 ? 
C26 C27 C23 60.9(8) . 2_676 ? 
C29 C27 C24 130.1(12) 2_676 2_676 ? 
C26 C27 C24 122.6(11) . 2_676 ? 
C23 C27 C24 61.8(8) 2_676 2_676 ? 
C29 C27 C28 122.7(8) 2_676 . ? 
C26 C27 C28 115.3(9) . . ? 
C23 C27 C28 54.4(6) 2_676 . ? 
C24 C27 C28 7.5(10) 2_676 . ? 
 
_diffrn_measured_fraction_theta_max    0.992 
_diffrn_reflns_theta_full              26.08 
_diffrn_measured_fraction_theta_full   0.992 
_refine_diff_density_max    0.302 
_refine_diff_density_min   -0.228 
_refine_diff_density_rms    0.061 
